# Supplementary material for: Inclusion and exclusion criteria used in non-specific low back pain trials: a review of randomised controlled trials published between 2006 and 2012
Source: Springer Nature journal article supplement (doi:10.1186/s12891-018-2034-6), 2018-04-12
Supplement: MOESM3 [file 15631796]

**Table S1: Included study characteristics**

| <b>Lead author</b> | <b>Publication year</b> | <b>Title</b>                                                                                                                                                                                                                                                 | <b>Sample size</b> |
|--------------------|-------------------------|--------------------------------------------------------------------------------------------------------------------------------------------------------------------------------------------------------------------------------------------------------------|--------------------|
| Ackerman, W.       | 2008                    | Pain Relief With Intraarticular or Medial Branch Nerve Blocks in Patients With Positive Lumbar Facet Joint SPECT Imaging: A 12-Week Outcome Study                                                                                                            | 46                 |
| Adamczyk, A        | 2009                    | Effectiveness of holistic Physiotherapy for low back pain                                                                                                                                                                                                    | 60                 |
| Ahmed, S           | 2009                    | Evaluation of the effects of shortwave diathermy in patients with chronic low back pain                                                                                                                                                                      | 97                 |
| Akbari, A.         | 2008                    | The effect of motor control exercise versus general exercise on lumbar local stabilizing muscles thickness: Randomized controlled trial of patients with chronic low back pain                                                                               | 49                 |
| Albaladejo, C      | 2010                    | The Efficacy of a Short Education Program and a Short Physiotherapy Program for Treating Low Back Pain in Primary Care                                                                                                                                       | 348                |
| Anema, J           | 2007                    | Multidisciplinary Rehabilitation for Subacute Low Back Pain: Graded Activity or Workplace Intervention or Both?                                                                                                                                              | 112                |
| Attanayake, A.M    | 2010                    | Clinical evaluation of selected yogic procedures in individuals with low back pain                                                                                                                                                                           | 12                 |
| Becker, A.         | 2008                    | Effects of Two Guideline Implementation Strategies on Patient Outcomes in Primary Care                                                                                                                                                                       | 1261               |
| Bello, a           | 2010                    | Hydrotherapy versus land-based exercises in the management of chronic low back pain: a comparative study                                                                                                                                                     | 12                 |
| Ben Salah Frih, Z  | 2009                    | Efficacy and treatment compliance of a home-based rehabilitation programme for chronic low back pain: A randomized, controlled study                                                                                                                         | 107                |
| Bialosky, Joel E   | 2009                    | Spinal Manipulative Therapy Has an immediate Effect on Thermal Pain Sensitivity in People With Low Back Pain: A Randomized Controlled Trial                                                                                                                  | 36                 |
| Bicalho, E         | 2010                    | Immediate effects of a high-velocity spine manipulation in paraspinal muscles activity of nonspecific chronic low-back pain subjects                                                                                                                         | 40                 |
| Birkenmaier, C.    | 2007                    | Medial branch blocks versus pericapsular blocks in selecting patients for percutaneous cryodenervation of lumbar facet joints                                                                                                                                | 26                 |
| Bishop, P B        | 2010                    | The Chiropractic Hospital-based Interventions Research Outcomes (CHIRO) Study: a randomized controlled trial on the effectiveness of clinical practice guidelines in the medical and chiropractic management of patients with acute mechanical low back pain | 72                 |
| Bogefeldt, J       | 2007                    | Sick leave reductions from a comprehensive manual therapy programme for low back pain: the Gotland Low Back Pain Study                                                                                                                                       | 301                |

| <b>Lead author</b>  | <b>Publication year</b> | <b>Title</b>                                                                                                                                                                       | <b>Sample size</b> |
|---------------------|-------------------------|------------------------------------------------------------------------------------------------------------------------------------------------------------------------------------|--------------------|
| Brennan G           | 2006                    | Identifying Subgroups of Patients With Acute/Subacute "Nonspecific" Low Back Pain: Results of a Randomized Clinical Trial                                                          | 123                |
| Brinkhaus B         | 2006                    | Acupuncture in patients with chronic low back pain                                                                                                                                 | 284                |
| Bronfort, G         | 2011                    | Supervised exercise, spinal manipulation, and home exercise for chronic low back pain: a randomized clinical trial                                                                 |                    |
| Browder, A          | 2007                    | Effectiveness of an Extension-Oriented Treatment Approach in a Subgroup of Subjects With Low Back Pain:A Randomized Clinical Trial                                                 | 48                 |
| Cairns M            | 2006                    | Randomized controlled trial of specific spinal stabilization exercises and conventional physiotherapy for recurrent low back pain                                                  | 97                 |
| Calmels, Paul       | 2009                    | Effectiveness of a Lumbar Belt in Subacute Low Back Pain<br>An Open, Multicentric, and Randomized Clinical Study                                                                   | 190                |
| Cecchi, F           | 2010                    | Spinal manipulation compared with back school and with individually delivered physiotherapy for the treatment of chronic low back pain: a randomized trial with one-year follow-up | 205                |
| Chan, C W           | 2011                    | Aerobic exercise training in addition to conventional physiotherapy for chronic low back pain: A randomized controlled trial.                                                      | 43                 |
| Chang, S            | 2008                    | Effects of piroxicam-beta-cyclodextrin sachets on abnormal postural sway in patients with chronic low back pain                                                                    | 42                 |
| Chatzitheodorou, D. | 2008                    | The effect of exercise on adrenocortical responsiveness of patients with chronic low back pain, controlled for psychological strain.                                               | 61                 |
| Cherkin, D          | 2011                    | A Comparison of the Effects of 2 Types of Massage and Usual Care on Chronic Low Back Pain                                                                                          | 380                |
| Cherkin, D          | 2009                    | A Randomized Trial Comparing Acupuncture, Simulated Acupuncture, and Usual Care for Chronic Low Back Pain                                                                          | 606                |
| Chiu, C             | 2011                    | The efficacy and safety of intramuscular injections of methylcobalamin in patients with chronic nonspecific low back pain: a randomised controlled trial                           | 58                 |
| Chown, M.           | 2008                    | A prospective study of patients with chronic back pain randomised to group exercise, physiotherapy or osteopathy                                                                   | 98                 |
| Cleland, J          | 2009                    | Comparison of the Effectiveness of Three Manual Physical Therapy Techniques in a Subgroup of Patients With Low Back Pain Who Satisfy a Clinical Prediction Rule                    | 108                |

| <b>Lead author</b> | <b>Publication year</b> | <b>Title</b>                                                                                                                                                                                                                        | <b>Sample size</b> |
|--------------------|-------------------------|-------------------------------------------------------------------------------------------------------------------------------------------------------------------------------------------------------------------------------------|--------------------|
| Costantino, C      | 2011                    | Mesotherapy versus Systemic Therapy in the Treatment of Acute Low Back Pain: A Randomized Trial                                                                                                                                     | 84                 |
| Costa, L           | 2009                    | Motor Control Exercise for Chronic Low Back Pain: A Randomized Placebo-Controlled Trial                                                                                                                                             | 154                |
| Critchley, D       | 2007                    | Effectiveness and Cost-Effectiveness of Three Types of Physiotherapy Used to Reduce Chronic Low Back Pain Disability                                                                                                                | 212                |
| Cuesta-Vargas, A   | 2011                    | Exercise, Manual Therapy, and Education with or Without High-Intensity Deep-Water Running for Nonspecific Chronic Low Back Pain                                                                                                     | 46                 |
| da Fonseca, J      | 2009                    | Laboratory Gait Analysis in Patients With Low Back Pain Before and After a Pilates Intervention                                                                                                                                     | 28                 |
| da Silva, A        | 2010                    | Evaluation of an Extract of Brazilian Arnica ( <i>Solidago chilensis</i> Meyen, Asteraceae) in Treating Lumbago                                                                                                                     | 20                 |
| Demirel, R.        | 2008                    | Effects of balneotherapy with exercise in patients with low back pain                                                                                                                                                               | 44                 |
| Demoulin, C        | 2010                    | Effectiveness of a semi-intensive multidisciplinary outpatient rehabilitation program in chronic low back pain                                                                                                                      | 160                |
| Di Cesare, A       | 2011                    | Comparison between the effects of trigger point mesotherapy versus acupuncture points mesotherapy in the treatment of chronic low back pain: A short term randomized controlled trial                                               | 61                 |
| Díaz Arribas, M    | 2009                    | Effectiveness of the Physical Therapy Godelive Denys-Struyf Method for Nonspecific Low Back Pain                                                                                                                                    | 126                |
| Djavid, G.         | 2007                    | In chronic low back pain, low level laser therapy combined with exercise is more beneficial than exercise alone in the long term: a randomised trial                                                                                | 53                 |
| Donzelli, S        | 2006                    | Two different techniques in the rehabilitation treatment of low back pain: A randomized controlled trial                                                                                                                            | 43                 |
| Dufour, N          | 2010                    | Treatment of Chronic Low Back Pain. A Randomized, Clinical Trial Comparing Group-Based Multidisciplinary Biopsychosocial Rehabilitation and Intensive Individual Therapist-Assisted Back Muscle Strengthening Exercises             | 272                |
| Dundar, U          | 2009                    | Clinical Effectiveness of Aquatic Exercise to Treat Chronic Low Back Pain                                                                                                                                                           | 65                 |
| Durmus, D          | 2010                    | Effects of Therapeutic Ultrasound and electrical stimulation program on pain, trunk muscle strength, disability, walking performance, quality of life, and depression in patients with low back pain: a randomised controlled trial | 59                 |
| Durmus, D          | 2010                    | Effects of Therapeutic Ultrasound on Pain, Disability, Walking Performance, Quality of Life, and Depression in Patients with Chronic Low Back Pain: A Randomized, Placebo Controlled Trial                                          | 42                 |

| <b>Lead author</b> | <b>Publication year</b> | <b>Title</b>                                                                                                                                                                               | <b>Sample size</b> |
|--------------------|-------------------------|--------------------------------------------------------------------------------------------------------------------------------------------------------------------------------------------|--------------------|
| Durmus, D          | 2009                    | Effects of electrical stimulation program on trunk muscle strength, functional capacity, quality of life, and depression in the patients with low back pain: a randomized controlled trial | 43                 |
| Eisenberg, D       | 2007                    | Addition of choice of complementary therapies to usual care for acute low back pain: a randomized controlled trial                                                                         | 444                |
| Engbert, K         | 2011                    | The Effects of Therapeutic Climbing in Patients with Chronic Low Back Pain                                                                                                                 | 23                 |
| Ergun, H           | 2010                    | The efficacy, safety, and pharmacokinetics of intramuscular and oral phenylramidol in patients with low back pain in an emergency department                                               | 72                 |
| Ewert, T           | 2009                    | The Comparative Effectiveness of a Multimodal Program Versus Exercise Alone for the Secondary Prevention of Chronic Low Back Pain and Disability                                           | 183                |
| Facci, L           | 2011                    | Effects of transcutaneous electrical nerve stimulation (TENS) and interferential currents (IFC) in patients with nonspecific chronic low back pain: randomized clinical trial              | 150                |
| Farhadi, K         | 2009                    | The effectiveness of wet-cupping for nonspecific low back pain in Iran: A randomized controlled trial                                                                                      | 98                 |
| Ferreira, M.       | 2007                    | Comparison of general exercise, motor control exercise and spinal manipulative therapy for chronic low back pain: A randomized trial                                                       | 224                |
| Ferreira, M        | 2009                    | Relationship between spinal stiffness and outcome in patients with chronic low back pain                                                                                                   | 191                |
| Field, T.          | 2007                    | Lower back pain and sleep disturbance are reduced following massage therapy                                                                                                                | 30                 |
| Fiore, P           | 2011                    | Short-term effects of high-intensity laser therapy versus ultrasound therapy in the treatment of low back pain: a randomized controlled trial                                              | 30                 |
| Franca, F          | 2010                    | Segmental stabilization and muscular strengthening in chronic low back pain - a comparative study                                                                                          | 30                 |
| Friedrich, M       | 2009                    | Long-Term Effect of a Combined Exercise and Motivational Program on the Level of Disability of Patients With Chronic Low Back Pain                                                         | 74                 |
| Fritz, J           | 2008                    | Is There a Subgroup of Patients With Low Back Pain Likely to Benefit From Mechanical Traction?                                                                                             | 64                 |
| George, S          | 2008                    | A Randomized Trial of Behavioral Physical Therapy Interventions for Acute and Sub-Acute Low Back Pain                                                                                      | 108                |
| Gladwell, V.       | 2006                    | Does a Program of Pilates Improve Chronic Low Back Pain.                                                                                                                                   | 34                 |
| Glazov, G          | 2009                    | Laser acupuncture for chronic non-specific low back pain: a controlled clinical                                                                                                            | 90                 |

| <b>Lead author</b> | <b>Publication year</b> | <b>Title</b>                                                                                                                                                                                 | <b>Sample size</b> |
|--------------------|-------------------------|----------------------------------------------------------------------------------------------------------------------------------------------------------------------------------------------|--------------------|
| Goldby L           | 2006                    | A randomized controlled trial investigating the efficiency of musculoskeletal physiotherapy on chronic low back disorder.                                                                    | 200                |
| Göhner, W.         | 2006                    | Preventing chronic back pain: evaluation of a theory-based cognitive-behavioural training programme for patients with subacute back pain                                                     | 47                 |
| Haake, M.          | 2007                    | German Acupuncture Trials (GERAC) for Chronic Low Back Pain                                                                                                                                  | 1117               |
| Hagen, E           | 2010                    | Adding a physical exercise programme to brief intervention for low back pain patients did not increase return to work                                                                        | 246                |
| Hall, A            | 2011                    | Tai Chi Exercise for Treatment of Pain and Disability in People With Persistent Low Back Pain: A Randomized Controlled Trial                                                                 | 160                |
| Hancock, M.        | 2007                    | Assessment of diclofenac or spinal manipulative therapy, or both, in addition to recommended first-line treatment for acute low back pain: a randomised controlled trial                     | 235                |
| Harts, C           | 2008                    | A high-intensity lumbar extensor strengthening program is little better than a low-intensity program or a waiting list control group for chronic low back pain: a randomised clinical trial  | 59                 |
| Hartvigsen, J      | 2010                    | Supervised and non-supervised Nordic walking in the treatment of chronic low back pain: a single blind randomized clinical trial                                                             | 136                |
| Henchoz, Y         | 2010                    | Role of Physical Exercise in Low Back Pain Rehabilitation<br>A Randomized Controlled Trial of a Three-Month Exercise Program in Patients Who Have Completed Multidisciplinary Rehabilitation | 103                |
| Henchoz, Y         | 2010                    | Functional multidisciplinary rehabilitation versus outpatient physiotherapy for non-specific low back pain: randomised controlled trial                                                      | 92                 |
| Heymans M          | 2006                    | The effectiveness of high-intensity versus low-intensity back schools in an occupational setting: A pragmatic randomized controlled trial                                                    | 299                |
| Heymans, M         | 2006                    | Does flexion-distraction help treat chronic low back pain?                                                                                                                                   |                    |
| Hondras, M         | 2009                    | A randomised controlled trial comparing 2 types of spinal manipulation and minimal conservative medical care for adults 55 years and older with subacute or chronic low back pain            | 213                |
| Hsieh, L           | 2006                    | Treatment of low back pain by acupuncture and physical therapy: randomised control trial                                                                                                     | 110                |
| Iles, R            | 2011                    | Telephone coaching can increase activity levels for people with non-chronic low back pain: a randomised trial                                                                                | 26                 |

| <b>Lead author</b> | <b>Publication year</b> | <b>Title</b>                                                                                                                                                              | <b>Sample size</b> |
|--------------------|-------------------------|---------------------------------------------------------------------------------------------------------------------------------------------------------------------------|--------------------|
| Inoue, M           | 2006                    | Relief of low back pain immediately after acupuncture treatment - a randomised, placebo controlled trial                                                                  | 31                 |
| Johnson, R.        | 2007                    | Active exercise, education, and cognitive behavioral therapy for persistent disabling low back pain: a randomized controlled trial                                        | 223                |
| Juni, P            | 2009                    | A randomised controlled trial of spinal manipulative therapy in acute low back pain                                                                                       | 104                |
| Kapitza            | 2010                    | First Non-Contingent Respiratory Biofeedback Placebo versus Contingent Biofeedback in Patients with Chronic Low Back Pain: A Randomized, Controlled, Double-Blind Trial   | 42                 |
| Kell, R            | 2011                    | The response of persons with chronic nonspecific low back pain to three different volumes of periodized musculoskeletal rehabilitation                                    | 240                |
| Kell, R            | 2009                    | A comparison of two forms of periodized exercise rehabilitation programs in the management of chronic nonspecific low-back pain                                           | 27                 |
| Kofotolis N        | 2006                    | Effects of two 4-week proprioceptive neuromuscular facilitation programs on muscle endurance, flexibility, and functional performance in women with chronic low back pain | 86                 |
| Koldaş Doğan, S.   | 2008                    | Comparison of three different approaches in the treatment of chronic low back pain                                                                                        | 55                 |
| Kroll,H.           | 2008                    | A randomized, double-blind, prospective study comparing the efficacy of continuous versus pulsed radiofrequency in the treatment of lumbar facet syndrome                 | 26                 |
| Kulisch, A         | 2009                    | Effect of thermal water and adjunctive electrotherapy on chronic low back pain: A double blind, randomized, follow up study.                                              | 71                 |
| Kumar, S           | 2010                    | Comparative efficacy of two multimodal treatments on male and female sub-groups with low back pain (part II)                                                              | 141                |
| Kumar, s           | 2009                    | Efficacy of two multimodal treatments on physical strength of occupationally subgrouped male with low back pain                                                           | 102                |
| Kumar, S           | 2009                    | Efficacy of dynamic muscular stabilization techniques (DMST) over conventional techniques in rehabilitation of chronic low back pain.                                     | 30                 |
| Lalanne, Kim       | 2009                    | Modulation of the flexion-relaxation response by spinal manipulative therapy: a control group study                                                                       | 27                 |
| Lamb, S            | 2010                    | Group cognitive behavioural treatment for low-back pain in primary care: a randomised controlled trial and cost-effectiveness analysis                                    | 598                |

| <b>Lead author</b> | <b>Publication year</b> | <b>Title</b>                                                                                                                                                                | <b>Sample size</b> |
|--------------------|-------------------------|-----------------------------------------------------------------------------------------------------------------------------------------------------------------------------|--------------------|
| Lambeek, L         | 2010                    | Randomised controlled trial of integrated care to reduce disability from chronic low back pain in working and private life                                                  | 134                |
| Lau, P.            | 2008                    | Early physiotherapy intervention in an Accident and Emergency Department reduces pain and improves satisfaction for patients with acute low back pain: a randomised trial   | 102                |
| Leeuw, M           | 2008                    | Exposure in vivo versus operant graded activity in chronic low back pain patients: Results of a randomized controlled trial                                                 | 85                 |
| Lengsfeld, M.      | 2007                    | Passive rotary dynamic sitting at the workplace by office-workers with lumbar pain: a randomized multicenter study                                                          | 231                |
| Leonhardt, C.      | 2008                    | TTM-based motivational counselling does not increase physical activity of low back pain patients in a primary care setting—A cluster-randomized controlled trial            | 1261               |
| Lewis, C.          | 2011                    | Strain-Counterstrain therapy combined with exercise is not more effective than exercise alone on pain and disability in people with acute low back pain: a randomised trial | 85                 |
| Limke, J           | 2008                    | Randomized trial comparing the effects of one set vs two sets of resistance exercises for outpatients with chronic low back pain and leg pain                               | 100                |
| Lin, M             | 2010                    | A comparison between pulsed radiofrequency and electroacupuncture for relieving pain in patients with chronic low back pain                                                 | 100                |
| Little, P          | 2008                    | Randomised controlled trial of Alexander technique lessons, exercise, and massage (ATEAM) for chronic and recurrent back pain                                               | 463                |
| Machado, L         | 2010                    | The effectiveness of the McKenzie method in addition to first-line care for acute low back pain: a randomized controlled trial                                              | 139                |
| Mackawan, S        | 2007                    | Effects of traditional Thai massage versus joint Mobilization on substance P and pain perception in patients with non-specific low back pain                                | 68                 |
| Magnussen, L       | 2007                    | Motivating disability pensioners with back pain to return to work - A randomized controlled trial                                                                           | 89                 |
| Marshall, P        | 2008                    | Muscle Activation Changes After Exercise Rehabilitation for Chronic Low Back Pain                                                                                           | 50                 |
| Marshall, P        | 2008                    | Self-Report Measures Best Explain Changes in Disability Compared With Physical Measures After Exercise Rehabilitation for Chronic Low Back Pain                             | 50                 |
| Mazza, M           | 2010                    | Escitalopram 20 mg versus duloxetine 60 mg for the treatment of chronic low back pain                                                                                       | 75                 |
| Mibielli, M        | 2009                    | Diclofenac plus B vitamins versus diclofenac monotherapy in lumbago: the DOLOR study                                                                                        | 372                |

| Lead author        | Publication year | Title                                                                                                                                                                                                                                      | Sample size |
|--------------------|------------------|--------------------------------------------------------------------------------------------------------------------------------------------------------------------------------------------------------------------------------------------|-------------|
| Mohseni-Bandpei, M | 2006             | A prospective randomised controlled trial of spinal manipulation and ultrasound in the treatment of chronic low back pain                                                                                                                  | 112         |
| Mohseni-Bandpei, M | 2011             | The effect of pelvic floor muscle exercise on women with chronic non-specific low back pain                                                                                                                                                | 20          |
| Morone, G          | 2011             | Quality of life improved by multidisciplinary back school program in patients with chronic non-specific low back pain: a single blind randomized controlled trial                                                                          | 70          |
| Muehlbacher M      | 2006             | Topiramate in Treatment of Patients With Chronic Low Back Pain: a randomized double-blind, placebo controlled study                                                                                                                        | 96          |
| Muller-Schwefe, G  | 2011             | Dysport(registered trademark) for the treatment of myofascial back pain: Results from an open-label, Phase II, randomized, multicenter, dose-ranging study                                                                                 | 181         |
| Muthukrishnan, R   | 2010             | The differential effects of core stabilization exercise regime and conventional physiotherapy regime on postural control parameters during perturbation in patients with movement and control impairment chronic low back pain<br>Research | 30          |
| Nassif, H          | 2011             | Evaluation of a randomized controlled trial in the management of chronic lower back pain in a french automotive industr: An Observational study                                                                                            | 60          |
| Newcomer, K        | 2008             | Is a videotape to change beliefs and behaviors superior to a standard videotape in acute low back pain? A randomized controlled trial                                                                                                      | 111         |
| Nigg, B            | 2009             | The Effectiveness of an Unstable Sandal on Low Back Pain and Golf Performance                                                                                                                                                              | 37          |
| Noredeman, L       | 2006             | Early access to physical therapy treatment for subacute low back pain in primary health care: a prospective randomized clinical trial                                                                                                      | 60          |
| Norris, C.         | 2008             | The role of an integrated back stability program in patients with chronic low back pain                                                                                                                                                    | 59          |
| Oleske, D.         | 2007             | Are Back Supports Plus Education More Effective Than Education Alone in Promoting Recovery From Low Back Pain?                                                                                                                             | 433         |
| Paatelma, M        | 2008             | Orthopaedic manual therapy, mckenzie method or advice only for low back pain in working adults: a randomized controlled trial with one year follow-up                                                                                      | 134         |
| Pach, D            | 2011             | Efficacy of Injections with Disci/Rhus Toxicodendron Compositum for Chronic Low Back Pain – A Randomized Placebo-Controlled Trial                                                                                                          | 142         |
| Paoloni, M         | 2011             | Kinesio taping applied to lumbar muscles influences clinical and electromyographic characteristics in chronic low back patients.                                                                                                           | 39          |



| <b>Lead author</b> | <b>Publication year</b> | <b>Title</b>                                                                                                                                                                         | <b>Sample size</b> |
|--------------------|-------------------------|--------------------------------------------------------------------------------------------------------------------------------------------------------------------------------------|--------------------|
| Paolucci, T        | 2011                    | Psychological features and outcomes of the Back School treatment in patients with chronic non-specific low back pain. A randomized controlled study                                  | 50                 |
| Perez-Palomares, S | 2010                    | Percutaneous Electrical Nerve Stimulation Versus Dry Needling: Effectiveness in the Treatment of Chronic Low Back Pain                                                               | 124                |
| Pengel, L          | 2007                    | Physiotherapist-directed exercise, advice, or both for subacute low back pain: a randomized trial                                                                                    | 259                |
| Petersen, T        | 2007                    | One-year follow-up comparison of the effectiveness of mckenzie treatment and strengthening training for patients with chronic low back pain: outcome and prognostic factors          | 260                |
| Powers, C          | 2008                    | Effects of a single session of posterior-to-anterior spinal mobilization and press-up exercise on pain response and lumbar spine extension in people with nonspecific low back pain. | 30                 |
| Rasmussen-Barr, E  | 2009                    | Graded Exercise for Recurrent Low-Back Pain A Randomized, Controlled Trial With 6-, 12-, and 36-Month Follow-ups                                                                     | 71                 |
| Rasmussen, J.      | 2008                    | Manipulation does not add to the effect of extension exercises in chronic low-back pain (LBP). A randomized, controlled, double blind study                                          | 72                 |
| Ritvanen, T.       | 2007                    | Dynamic surface electromyographic responses in chronic low back pain treated by traditional bone setting and conventional physical therapy                                           | 61                 |
| Roche-Leboucher, G | 2011                    | Multidisciplinary Intensive Functional Restoration Versus Outpatient Active Physiotherapy in Chronic Low Back Pain                                                                   | 131                |
| Roche, G.          | 2007                    | Comparison of a functional restoration program with active individual physical therapy for patients with chronic low back pain: a randomized controlled trial                        | 132                |
| Sahin, N           | 2011                    | Effectiveness of back school for treatment of pain and functional disability in patients with chronic low back pain: a randomised controlled trial                                   | 146                |
| Santaella, K       | 2009                    | Assessment of a Biofeedback Program to Treat Chronic Low Back Pain                                                                                                                   | 60                 |
| Schiltewolf, M     | 2006                    | Comparison of a biopsychosocial therapy (BT) with a conventional biomedical therapy (MT) of subacute low back pain in the first episode of sick leave: a randomized controlled trial | 61                 |
| Senna, M           | 2011                    | Does Maintained Spinal Manipulation Therapy for Chronic Nonspecific Low Back Pain Result in Better Long-Term Outcome?                                                                | 88                 |
| Shankar, N         | 2011                    | Autonomic status and pain profile in patients of chronic low back pain and following electro acupuncture therapy: A randomized controlled trial                                      | 60                 |

| <b>Lead author</b> | <b>Publication year</b> | <b>Title</b>                                                                                                                                                                         | <b>Sample size</b> |
|--------------------|-------------------------|--------------------------------------------------------------------------------------------------------------------------------------------------------------------------------------|--------------------|
| Sherman, K         | 2011                    | A Randomized Trial Comparing Yoga, Stretching, and a Self-care Book for Chronic Low Back Pain                                                                                        | 206                |
| Shirado, O         | 2010                    | Multicenter Randomized Controlled Trial to Evaluate the Effect of Home-Based Exercise on Patients With Chronic Low Back Pain                                                         | 175                |
| Skljarevski, V     | 2010                    | Efficacy and Safety of Duloxetine in Patients With Chronic Low Back Pain                                                                                                             | 236                |
| Skljarevski, V     | 2009                    | A double-blind, randomized trial of duloxetine versus placebo in the management of chronic low back pain                                                                             | 404                |
| Skljarevski, V     | 2010                    | Duloxetine Versus Placebo in Patients With Chronic Low Back Pain: A 12-Week, Fixed-Dose, Randomized, Double-Blind Trial                                                              | 401                |
| Skljarevski, V     | 2009                    | Maintenance of Effect of Duloxetine in Patients with Chronic Low Back Pain: A 41-week Uncontrolled, Dose-blinded Study                                                               | 177                |
| Smeets, R          | 2006                    | Reduction of Pain Catastrophizing Mediates the Outcome of Both Physical and Cognitive-Behavioral Treatment in Chronic Low Back Pain                                                  | 211                |
| Smeets, R          | 2006                    | Active rehabilitation for chronic low back pain: Cognitive-behavioral, physical, or both? First direct posttreatment results from a randomized controlled trial                      | 223                |
| Sorensen, P        | 2010                    | An educational approach based on a non-injury model compared with individual symptom-based physical training in chronic LBP. A pragmatic, randomised trial with a one-year follow-up | 185                |
| Steenstra, I       | 2006                    | Economic Evaluation of a Multi-Stage Return toWork Program for Workers on Sick-Leave Due to Low Back Pain                                                                            | 196                |
| Steenstra, I       | 2006                    | The effectiveness of graded activity for low back pain in occupational healthcare                                                                                                    | 112                |
| Suen, L            | 2007                    | Auriculotherapy on low back pain in the elderly                                                                                                                                      | 60                 |
| Suni J             | 2006                    | Control of the lumbar neutral zone decreases low back pain and improves self-evaluated work ability: a 12-month randomized controlled study                                          | 92                 |
| Szczurko, O        | 2007                    | Naturopathic care for chronic low back pain: a randomized trial                                                                                                                      | 59                 |
| Tefner, I          | 2011                    | The effect of spa therapy in chronic low back pain: a randomized controlled, single-blind, follow-up study                                                                           | 37                 |
| Tekur, P           | 2008                    | Effect of Short-Term Intensive Yoga Program on Pain, Functional Disability, and Spinal Flexibility in Chronic Low Back Pain: A Randomized Control Study                              | 80                 |

| <b>Lead author</b> | <b>Publication year</b> | <b>Title</b>                                                                                                                                                                       | <b>Sample size</b> |
|--------------------|-------------------------|------------------------------------------------------------------------------------------------------------------------------------------------------------------------------------|--------------------|
| Tekur, P           | 2010                    | Effect of yoga on quality of life of CLBP patients: A randomized control study                                                                                                     | 80                 |
| Thomas K           | 2006                    | Randomized controlled trial of a short course of traditional acupuncture with usual care for persistent non-specific low back pain                                                 | 215                |
| Unsgaard-Tondel, M | 2010                    | Motor Control Exercises, Sling Exercises, and General Exercises for Patients With Chronic Low Back Pain: A Randomized Controlled Trial With 1-Year Follow-up                       | 109                |
| van der Roer       | 2008                    | Intensive group training protocol versus guideline physiotherapy for patients with chronic low back pain: a randomised controlled trial                                            | 102                |
| Vasseljen, O       | 2011                    | Effect of Core Stability Exercises on Feed-Forward Activation of Deep Abdominal Muscles in Chronic Low Back Pain                                                                   | 87                 |
| Vong, S K          | 2011                    | Motivational Enhancement therapy in addition to physical therapy improves motivational factors and treatment outcomes in people with low back pain: A randomized controlled trial. | 76                 |
| Weiner, D.         | 2008                    | Efficacy of Percutaneous Electrical Nerve Stimulation and Therapeutic Exercise for Older Adults with Chronic Low Back Pain: A Randomized Controlled Trial                          | 184                |
| Whitfill, T        | 2010                    | Early Intervention Options for Acute Low Back Pain Patients: A Randomized Clinical Trial with One-Year Follow-Up Outcomes                                                          | 102                |
| Wilkey, A          | 2008                    | A Comparison Between Chiropractic Management and Pain Clinic Management for Chronic Low-Back Pain in a National Health Service Outpatient Clinic                                   | 30                 |
| Williams, K        | 2009                    | Evaluation of the Effectiveness and Efficacy of Iyengar Yoga Therapy on Chronic Low Back Pain                                                                                      | 90                 |
| Witt               | 2006                    | Pragmatic randomized trial evaluating the clinical and economic effectiveness of Acupuncture for Chronic Low back Pain                                                             | 2594               |
| Yildirim, Y        | 2010                    | Relationship between learning strategies of patients and proper perception of the home exercise program with non-specific low back pain                                            | 26                 |
| Zaringhalam, J     | 2010                    | Reduction of chronic non-specific low back pain: A randomised controlled clinical trial on acupuncture and baclofen                                                                | 80                 |
